# Supplementary material
Source: publisher figshare collection journal article supplement (https://karger.figshare.com/ndownloader/files/38310759)
Supplement: Supplementary file 1 [file 38310759]

Supplement Table I. Potassium according to AKI groups, divided into hypo- and normokalemia (K< 5 mmol/l) vs hyperkalemia (K≥5 mmol/l).

|  | **Prerenal** | | | **Renal** | | | **Postrenal** | | | **AKI on CKD** | | |
| --- | --- | --- | --- | --- | --- | --- | --- | --- | --- | --- | --- | --- |
| K <5 mmol/l | K≥5  mmol/l | *p** | K <5  mmol/l | K≥5  mmol/l | *p** | K <5  mmol/l | K≥5  mmol/l | *p** | K <5  mmol/l | K≥5  mmol/l | *p** |
| N (%) | N (%) | N (%) | N (%) | N (%) | N (%) | N (%) | N (%) |
| 491 (75) | 163 (24) | <0.001 | 114 (80) | 29 (20) | <0.001 | 76 (61) | 49 (39) | <0.05 | 319 (63) | 187 (37) | <0.001 |
|  | | | | | | | | | | | | |
|  | Mean (SD) | Mean (SD) | *p*§ | Mean (SD) | Mean (SD) | *p*§ | Mean (SD) | Mean (SD) | *p*§ | Mean (SD) | Mean (SD) | *p*§ |
| Age  (years) | 72 (17) | 76 (13) | <0.01 | 59 (21) | 69 (17) | <0.01 | 75 (14) | 76 (13) | NS | 74 (15) | 76 (12) | NS |
| Previous sCr (µmol/l) | 101 (49) | 105 (51) | NS | 110 (54) | 98 (41) | NS | 112 (54) | 125 (83) | NS | 185 (117) | 191 (90) | NS |
| sCr admission (µmol/l) | 325 (233) | 440 (323) | <0.001 | 394 (286) | 395 (232) | NS | 449 (331) | 734 (575) | <0.01 | 427 (261) | 516 (286) | <0.001 |
| BMI  (kg/m2) | 26 (6) | 26 (6) | NS | 27 (6) | 27 (6) | NS | 26 (5) | 25 (7) | NS | 26 (6) | 27 (6) | <0.05 |
| Hemoglobin (g/l) | 123 (23) | 118 (23) | <0.05 | 112 (21) | 116 (22) | NS | 114 (22) | 113 (22) | NS | 111 (21) | 110 (22) | NS |
| St bicarbonate (mmol/l) | 22 (4) | 18 (4) | <0.001 | 22 (3) | 20 (2) | <0.05 | 22 (3) | 18 (4) | <0.001 | 21 (4) | 18 (4) | <0.001 |
|  | | | | | | | | | | | | |
|  | Median (IQR) | Median (IQR) | *p*¶ | Median (IQR) | Median (IQR) | *p*¶ | Median (IQR) | Median (IQR) | *p*¶ | Median (IQR) | Median (IQR) | *p*¶ |
| CRP  (mg/l) | 51 (122) | 21 (72) | <0.001 | 34 (98) | 50 (117) | NS | 58 (131) | 49 (137) | NS | 27 (112) | 26 (80) | NS |
| ACR (mg/mmol) | 9 (25) | 7 (17) | NS | 35 (159) | 64 (232) | NS | 18 (62) | 24 (54) | NS | 17 (70) | 16 (87) | NS |

* Chi-2 analysis. § Students t-test. ¶ Students t-test based on logarithmic values
